## Correction: Integrated epigenetic and genetic analysis identifies markers of prognostic significance in pediatric acute myeloid leukemia

Jatinder K. Lamba<sup>1</sup>, Xueyuan Cao<sup>2</sup>, Susana C. Raimondi<sup>3</sup>, Roya Rafiee<sup>1</sup>, James R. Downing<sup>3</sup>, Lei Shi<sup>2</sup>, Tanja Gruber<sup>4</sup>, Raul C. Ribeiro<sup>4</sup>, Jeffrey E. Rubnitz<sup>4</sup> and Stanley B. Pounds<sup>2</sup>

<sup>1</sup> Department of Pharmacotherapy and Translational Research, Center for Pharmacogenomics, University of Florida, Gainesville, FL, USA

<sup>2</sup> Department of Biostatistics, St. Jude Children's Research Hospital, Memphis, TN, USA

<sup>3</sup> Department of Pathology, St. Jude Children's Research Hospital, Memphis, TN, USA

<sup>4</sup> Department of Oncology, St. Jude Children's Research Hospital, Memphis, TN, USA

**Published:** July 13, 2018

**Copyright:** Lamba et al. This is an open-access article distributed under the terms of the Creative Commons Attribution License 3.0 (CC BY 3.0), which permits unrestricted use, distribution, and reproduction in any medium, provided the original author and source are credited.

**This article has been corrected:** The corrected author name is given below:

### Lei Shi

Original article: Oncotarget. 2018; 9:26711-26723. <https://doi.org/10.18632/oncotarget.25475>
